# Supplementary material
Source: PubMed Central journal article supplement (PMC8427907)
Supplement: mmc1.pdf [file mmc1.pdf]

## Supplementary Material

# Deep Learning for the discovery of new pre-miRNAs: helping the fight against COVID-19

L. A. Bugnon, J. Raad, G. Merino, C. Yones, F. Ariel, D.H. Milone, G. Stegmayer

Table S1: Features computed for each hairpin sequence.

| Feature name            | Description                                                                                                                                       |
|-------------------------|---------------------------------------------------------------------------------------------------------------------------------------------------|
| nt_proportion           | Ratio of each base in the sequence (A, C, G and T).                                                                                               |
| dinucleotide_proportion | Ratio of dinucleotide elements of each kind, making 16 features for the possible binary combinations of the 4 nucleotides.                        |
| gc_content              | Proportion of guanine-cytosine on the sequence.                                                                                                   |
| gc_ratio                | Ratio between guanine and cytosine.                                                                                                               |
| sequence_length         | Length of the sequence.                                                                                                                           |
| stem_number             | Number of stem-loops.                                                                                                                             |
| avg_bp_stem             | Average of nucleotides per stem.                                                                                                                  |
| longest_stem_length     | Longest region where the pairing is perfect.                                                                                                      |
| terminal_loop_length    | Number of nucleotides in the stem region.                                                                                                         |
| bp_number               | Number of base-pairs.                                                                                                                             |
| dP                      | Number of base pair divided by the nucleotide number.                                                                                             |
| bp_proportion           | Number of each possible base pair normalized by sequence length.                                                                                  |
| bp_proportion_stem      | Proportion of base pairs on stems.                                                                                                                |
| triplets                | Frequencies of secondary structure triplets, this is the 32 possible combinations of the 4 nucleotides in a sequence of 3.                        |
| MFE                     | Minimum free energy.                                                                                                                              |
| EFE                     | Normalized Ensemble Free Energy calculated with RNAfold (-p option).                                                                              |
| ensemble_frequency      | Frequency of the minimum free energy in the ensemble.                                                                                             |
| diversity               | Structural diversity calculated with RNAfold (-p option).                                                                                         |
| mfe_efe_difference      | Calculated as $ MFE - EFE /l$ .                                                                                                                   |
| dQ                      | Calculated as $1/L \sum_{i < j} p_{ij} \log_2 p_{ij}$ , where L is length and $p_{ij}$ is the probability of pairing of nucleotides $i$ and $j$ . |
| dG                      | Minimum free energy divided by sequence length.                                                                                                   |
| MFEI1                   | Ratio between the minimum free energy and the $\%C + G$ .                                                                                         |
| MFEI2                   | $dG/N_s$ , where $N_s$ is the number of stems.                                                                                                    |
| MFEI4                   | $MFE/N_b$ , where $N_b$ is the total number of base pairs in the secondary structure.                                                             |
